# Supplementary material for: Mesenchymal stem cell-derived extracellular vesicles protect retina in a mouse model of retinitis pigmentosa by anti-inflammation through miR-146a-Nr4a3 axis
Source: PubMed Central journal article supplement (PMC9351183; doi:10.1186/s13287-022-03100-x), 2022-08-03

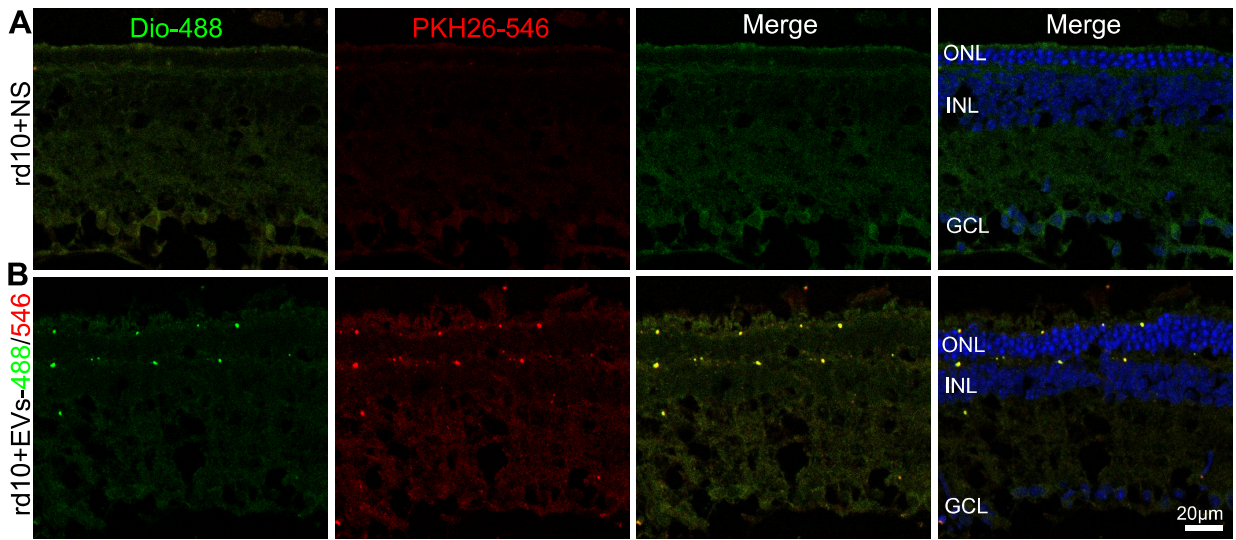

Supplement: 13287_2022_3100_MOESM5_ESM.pdf [file 13287_2022_3100_MOESM5_ESM.pdf]
