# Supplementary material for: Mesenchymal stem cell-derived extracellular vesicles protect retina in a mouse model of retinitis pigmentosa by anti-inflammation through miR-146a-Nr4a3 axis
Source: PubMed Central journal article supplement (PMC9351183; doi:10.1186/s13287-022-03100-x), 2022-08-03
Supplement: 13287_2022_3100_MOESM9_ESM.pdf [file 13287_2022_3100_MOESM9_ESM.pdf]

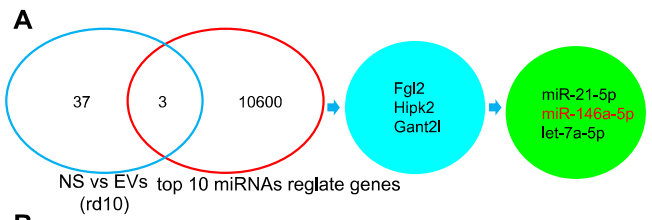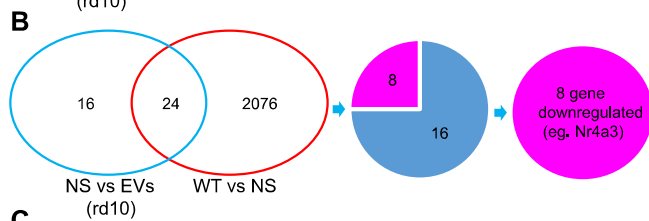

**C**  
binding site 1

Nr4a3 5'—UCUACUGUUCUUAUAGUUCUCA—5'  
miR-146a-5p 3'—UUGGGUACCUUAAGUCAAGAGU—3'

binding site 2

Nr4a3 5'—UUGGAACCUAUUGUAUUUCUCA—5'  
miR-146a-5p 3'—UUGGGUACCUUAAGUCAAGAGU—3'
